# Supplementary material
Source: MDPI journal article supplement (https://www.mdpi.com/2073-4441/12/6/1812)
Supplement: s1 [file s1]

Article

# A Modified ABCD Model with Temperature-Dependent Parameters for Cold Regions: Application to Reconstruct the Changing Runoff in the Headwater Catchment of the Golmud River, China

Xiaoshu Wang <sup>1,2</sup>, Bing Gao <sup>1,2,\*</sup> and Xusheng Wang <sup>3</sup>

Supplementary Materials

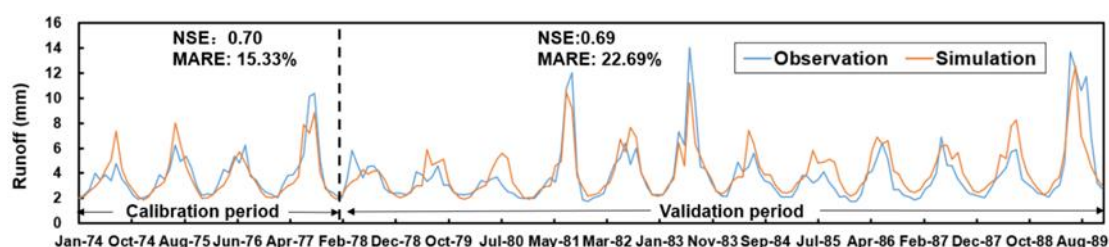

**Figure S1.** Monthly runoff results from the ABCD-CR model in the experiment using a 4-year calibration period (1974–1977) and a 12-year validation period (1978–1989).
